# Supplementary material for: Intra-Urban Variation of Intimate Partner Violence Against Women and Men in Kenya: Evidence from the 2014 Kenya Demographic and Health Survey
Source: PubMed Central journal article supplement (PMC9900693; doi:10.1177/08862605221120893), 2022-09-05
Supplement: sj-pdf-1-jiv-10.1177_08862605221120893.pdf [file sj-pdf-1-jiv-10.1177_08862605221120893.pdf]

**Appendix A.** Characteristics of the urban female sample (age 15-49) and urban male sample (age 15-54) by residence (Kenya, 2014).

|                        | Females             |                         |                   |                    | Males                              |                         |                   |                    |               |
|------------------------|---------------------|-------------------------|-------------------|--------------------|------------------------------------|-------------------------|-------------------|--------------------|---------------|
|                        | Informal<br>(N=608) | Intermediate<br>(N=796) | Formal<br>(N=209) | Total<br>(N=1,613) | Informal<br>(N=440)                | Intermediate<br>(N=681) | Formal<br>(N=200) | Total<br>(N=1,321) |               |
| <b>Age (years)</b>     |                     |                         |                   |                    | <b>Age (years)</b>                 |                         |                   |                    |               |
| Median (IQR)           | 30 (25, 36)         | 29 (25,35)              | 30 (26, 35)       | 29 (25, 36)        | Median (IQR)                       | 35 (29, 41.25)          | 34 (29, 41)       | 35.5 (30, 42)      | 35 (29, 41)   |
| <b>Education level</b> |                     |                         |                   |                    | <b>Education level</b>             |                         |                   |                    |               |
| No schooling           | 80 (13.2%)          | 83 (10.4%)              | 4 (1.9%)          | 167 (10.4%)        | No schooling                       | 25 (5.7%)               | 24 (3.5%)         | 3 (1.5%)           | 52 (3.9%)     |
| Primary                | 364 (59.9%)         | 348 (43.7%)             | 62 (29.7%)        | 774 (48.0%)        | Primary                            | 273 (62.0%)             | 267 (39.2%)       | 40 (20.0%)         | 580 (43.9%)   |
| Secondary              | 150 (24.7%)         | 254 (31.9%)             | 69 (33.0%)        | 473 (29.3%)        | Secondary                          | 114 (25.9%)             | 244 (35.8%)       | 80 (40.0%)         | 438 (33.2%)   |
| Higher                 | 14 (2.3%)           | 111 (13.9%)             | 74 (35.4%)        | 199 (12.3%)        | Higher                             | 28 (6.4%)               | 146 (21.4%)       | 77 (38.5%)         | 251 (19.0%)   |
| <b>Wealth</b>          |                     |                         |                   |                    | <b>Wealth</b>                      |                         |                   |                    |               |
| Poorest                | 159 (26.2%)         | 11 (1.4%)               | 0 (0.0%)          | 170 (10.5%)        | Poorest                            | 93 (21.1%)              | 7 (1.0%)          | 0 (0.0%)           | 100 (7.6)     |
| Poor                   | 176 (28.9%)         | 23 (2.9%)               | 1 (0.5%)          | 200 (12.4%)        | Poor                               | 132 (30.0%)             | 28 (4.1%)         | 0 (0.0%)           | 160 (12.1)    |
| Middle                 | 138 (22.7%)         | 85 (10.7%)              | 0 (0.0%)          | 223 (13.8%)        | Middle                             | 126 (28.6%)             | 64 (9.4%)         | 1 (0.5%)           | 191 (14.5)    |
| Rich                   | 125 (20.6%)         | 304 (38.2%)             | 11 (5.3%)         | 440 (27.3%)        | Rich                               | 82 (18.6%)              | 265 (38.9%)       | 25 (12.5%)         | 372 (28.2)    |
| Richest                | 10 (1.6%)           | 373 (46.9%)             | 197 (94.3%)       | 580 (36.0%)        | Richest                            | 7 (1.6%)                | 317 (46.5%)       | 174 (87.0%)        | 498 (37.7)    |
| <b>Marital status</b>  |                     |                         |                   |                    | <b>Marital status</b>              |                         |                   |                    |               |
| Married                | 472 (77.6%)         | 615 (77.3%)             | 165 (78.8%)       | 1,252 (77.6%)      | Married                            | 373 (84.8%)             | 614 (90.2%)       | 181 (90.5%)        | 1,168 (88.4%) |
| Cohabiting             | 46 (7.6%)           | 60 (7.5%)               | 12 (5.7%)         | 118 (7.3%)         | Cohabiting                         | 15 (3.4%)               | 19 (2.8%)         | 9 (4.5%)           | 43 (3.3%)     |
| Separated/<br>Divorced | 65 (10.7%)          | 93 (11.7%)              | 29 (13.9%)        | 187 (11.6%)        | Separated/<br>Divorced/<br>Widowed | 52 (11.8%)              | 48 (7.0%)         | 10 (5.0%)          | 110 (8.3%)    |
| Widowed                | 25 (4.1%)           | 28 (3.5%)               | 3 (1.4%)          | 56 (3.5%)          |                                    |                         |                   |                    |               |

|                                                         |             |             |             |               |                                                         |             |             |             |               |
|---------------------------------------------------------|-------------|-------------|-------------|---------------|---------------------------------------------------------|-------------|-------------|-------------|---------------|
| <b>Father beat mother</b>                               |             |             |             |               | <b>Father beat mother</b>                               |             |             |             |               |
| No                                                      | 324 (53.6%) | 482 (60.8%) | 137 (65.6%) | 947 (58.7%)   | No                                                      | 183 (41.8%) | 360 (52.9%) | 115 (57.5%) | 659 (49.9%)   |
| Don't know                                              | 42 (6.9%)   | 43 (5.4%)   | 8 (3.8%)    | 93 (5.8%)     | Don't know                                              | 27 (6.1%)   | 37 (5.4%)   | 13 (6.5%)   | 77 (5.8%)     |
| Yes                                                     | 240 (39.5%) | 269 (33.8%) | 64 (30.6%)  | 571 (35.5%)   | Yes                                                     | 229 (52.0%) | 284 (41.7%) | 72 (36.0%)  | 585 (44.3%)   |
| <b>Partner's alcohol use</b>                            |             |             |             |               | <b>Partner's alcohol use</b>                            |             |             |             |               |
| No alcohol                                              | 396 (65.1%) | 562 (70.6%) | 132 (63.2%) | 1,090 (67.6%) | No alcohol                                              | 413 (93.9%) | 657 (96.5%) | 188 (94.0%) | 1,258 (95.2%) |
| Gets drunk often                                        | 83 (13.7%)  | 75 (9.3%)   | 31 (14.8%)  | 189 (11.7%)   | Drinks alcohol                                          | 27 (6.1%)   | 24 (3.5%)   | 12 (6.0%)   | 63 (4.8%)     |
| Gets drunk sometimes                                    | 129 (21.2%) | 159 (20.0%) | 45 (22.0%)  | 334 (20.7%)   |                                                         |             |             |             |               |
| <b>Current use of physical violence against partner</b> |             |             |             |               | <b>Current use of physical violence against partner</b> |             |             |             |               |
| No                                                      | 589 (96.9%) | 781 (98.1%) | 202 (96.7%) | 1,572 (97.5%) | No                                                      | 349 (79.3%) | 622 (91.3%) | 178 (89.0%) | 1,149 (87.0%) |
| Yes                                                     | 19 (3.1%)   | 15 (1.9%)   | 7 (3.3%)    | 41 (2.5%)     | Yes                                                     | 91 (20.7%)  | 59 (8.7%)   | 22 (11.0%)  | 172 (13.0%)   |

Note. IQR = Inter Quartile Range.
