# Supplementary material for: Intra-Urban Variation of Intimate Partner Violence Against Women and Men in Kenya: Evidence from the 2014 Kenya Demographic and Health Survey
Source: PubMed Central journal article supplement (PMC9900693; doi:10.1177/08862605221120893), 2022-09-05
Supplement: sj-pdf-2-jiv-10.1177_08862605221120893.pdf [file sj-pdf-2-jiv-10.1177_08862605221120893.pdf]

**Appendix B.** Estimates from binomial mixed-effects models for any current intimate partner violence against women (age 15-49) and men (age 15-54) in urban areas in Kenya (2014).

| Term                                            | Females                |       |                         |       | Males                                           |                   |                         |                   |       |
|-------------------------------------------------|------------------------|-------|-------------------------|-------|-------------------------------------------------|-------------------|-------------------------|-------------------|-------|
|                                                 | Model 1<br>OR (95% CI) | p     | Model 2<br>aOR (95% CI) | p     | Model 1<br>OR (95% CI)                          | p                 | Model 2<br>aOR (95% CI) | p                 |       |
| <b>Neighbourhood</b>                            |                        |       |                         |       | <b>Neighbourhood</b>                            |                   |                         |                   |       |
| Informal                                        | 1.92 (1.31, 2.83)      | <0.01 | 1.39 (0.91, 2.13)       | 0.13  | Informal                                        | 1.08 (0.68, 1.73) | 0.73                    | 0.89 (0.53, 1.50) | 0.67  |
| Intermediate                                    | 1.1 (0.76, 1.59)       | 0.62  | 0.94 (0.62, 1.4)        | 0.75  | Intermediate                                    | 0.72 (0.47, 1.1)  | 0.13                    | 0.79 (0.50, 1.25) | 0.31  |
| <b>Education level</b>                          |                        |       |                         |       | <b>Education level</b>                          |                   |                         |                   |       |
| No schooling                                    |                        |       | 1.41 (0.74, 2.69)       | 0.29  | No/ Primary/<br>Secondary                       |                   |                         | 0.69 (0.46, 1.04) | 0.08  |
| Primary/<br>Secondary                           |                        |       | 2.31 (1.49, 3.57)       | <0.01 |                                                 |                   |                         |                   |       |
| <b>Father beat mother</b>                       |                        |       |                         |       | <b>Father beat mother</b>                       |                   |                         |                   |       |
| Yes                                             |                        |       | 1.71 (1.33, 2.2)        | <0.01 | Yes                                             |                   |                         | 1.59 (1.14, 2.22) | 0.01  |
| Don't know                                      |                        |       | 1.54 (0.93, 2.56)       | 0.1   | Don't know                                      |                   |                         | 1.72 (0.89, 3.31) | 0.11  |
| <b>Marital status</b>                           |                        |       |                         |       | <b>Marital status</b>                           |                   |                         |                   |       |
| Cohabiting                                      |                        |       | 1.22 (0.78, 1.91)       | 0.38  | Cohabiting                                      |                   |                         | 1.46 (0.65, 3.29) | 0.36  |
| Separated/<br>Divorced                          |                        |       | 1.65 (1.1, 2.49)        | 0.02  | Separated/<br>Divorced/<br>Widowed              |                   |                         | 2.71 (1.56, 4.71) | <0.01 |
| Widowed                                         |                        |       | 0.92 (0.46, 1.83)       | 0.82  |                                                 |                   |                         |                   |       |
| <b>Use of physical violence against partner</b> |                        |       |                         |       | <b>Use of physical violence against partner</b> |                   |                         |                   |       |

| Term                         | Females                |   |                         |       |                              | Males                  |   |                         |       |
|------------------------------|------------------------|---|-------------------------|-------|------------------------------|------------------------|---|-------------------------|-------|
|                              | Model 1<br>OR (95% CI) | p | Model 2<br>aOR (95% CI) | p     |                              | Model 1<br>OR (95% CI) | p | Model 2<br>aOR (95% CI) | p     |
| Yes                          |                        |   | 11.32 (4.23,<br>30.34)  | <0.01 | Yes                          |                        |   | 5.76 (3.91,<br>8.49)    | <0.01 |
| <b>Partner's alcohol use</b> |                        |   |                         |       | <b>Partner's alcohol use</b> |                        |   |                         |       |
| Sometimes drunk              |                        |   | 1.81 (1.35,<br>2.42)    | <0.01 | Drinks alcohol               |                        |   | 2.14 (1.11,<br>4.11)    | 0.02  |
| Often drunk                  |                        |   | 5.86 (3.92,<br>8.77)    | <0.01 |                              |                        |   |                         |       |

Note. Estimates in this table are based on binomial mixed-effects models. Any current intimate partner violence (IPV) = emotional, physical and/or sexual IPV. Residence: Reference level (Ref) = Formal; Models 1: unadjusted. Models 2: adjusted for Education (Ref=Higher), Father beat mother (Ref=No), Marital status (Ref=Married), Use of physical violence against spouse/ partner (Ref=No), Partner's alcohol use (Ref=No alcohol).
