# Supplementary material for: Intra-Urban Variation of Intimate Partner Violence Against Women and Men in Kenya: Evidence from the 2014 Kenya Demographic and Health Survey
Source: PubMed Central journal article supplement (PMC9900693; doi:10.1177/08862605221120893), 2022-09-05
Supplement: sj-pdf-3-jiv-10.1177_08862605221120893.pdf [file sj-pdf-3-jiv-10.1177_08862605221120893.pdf]

**Appendix C.** Estimates from binomial mixed-effects models for any current intimate partner violence against women (age 15-49) in urban areas in Kenya (2014).

| Term                                            | Model 1           |       | Model 2           |       | Model 3           |       | Model 4           |       | Model 5             |       | Model 6           |       |
|-------------------------------------------------|-------------------|-------|-------------------|-------|-------------------|-------|-------------------|-------|---------------------|-------|-------------------|-------|
|                                                 | OR (95% CI)       | p     | aOR (95%CI)       | p     | aOR (95% CI)      | p     | aOR (95% CI)      | p     | aOR (95% CI)        | p     | aOR (95% CI)      | p     |
| <b>Neighbourhood</b>                            |                   |       |                   |       |                   |       |                   |       |                     |       |                   |       |
| Informal                                        | 1.92 (1.31, 2.83) | <0.01 | 1.49 (0.99, 2.23) | 0.05  | 1.79 (1.21, 2.64) | <0.01 | 1.88 (1.28, 2.78) | <0.01 | 1.92 (1.29, 2.84)   | <0.01 | 1.87 (1.25, 2.78) | <0.01 |
| Intermediate                                    | 1.1 (0.76, 1.59)  | 0.62  | 0.93 (0.64, 1.35) | 0.7   | 1.06 (0.73, 1.53) | 0.77  | 1.07 (0.74, 1.55) | 0.73  | 1.12 (0.77, 1.62)   | 0.56  | 1.13 (0.77, 1.65) | 0.54  |
| <b>Education level</b>                          |                   |       |                   |       |                   |       |                   |       |                     |       |                   |       |
| No schooling                                    |                   |       | 1.56 (0.84, 2.91) | 0.16  |                   |       |                   |       |                     |       |                   |       |
| Primary/<br>Secondary                           |                   |       | 2.48 (1.64, 3.74) | <0.01 |                   |       |                   |       |                     |       |                   |       |
| <b>Father beat mother</b>                       |                   |       |                   |       |                   |       |                   |       |                     |       |                   |       |
| Yes                                             |                   |       |                   |       | 1.82 (1.44, 2.32) | <0.01 |                   |       |                     |       |                   |       |
| Don't know                                      |                   |       |                   |       | 1.45 (0.9, 2.34)  | 0.12  |                   |       |                     |       |                   |       |
| <b>Marital status</b>                           |                   |       |                   |       |                   |       |                   |       |                     |       |                   |       |
| Cohabiting                                      |                   |       |                   |       |                   |       | 1.19 (0.78, 1.80) | 0.42  |                     |       |                   |       |
| Separated/<br>Divorced                          |                   |       |                   |       |                   |       | 2.29 (1.58, 3.33) | <0.01 |                     |       |                   |       |
| Widowed                                         |                   |       |                   |       |                   |       | 1.06 (0.55, 2.05) | 0.86  |                     |       |                   |       |
| <b>Use of physical violence against partner</b> |                   |       |                   |       |                   |       |                   |       |                     |       |                   |       |
| Yes                                             |                   |       |                   |       |                   |       |                   |       | 12.17 (4.66, 31.77) | <0.01 |                   |       |
| <b>Partner's alcohol use</b>                    |                   |       |                   |       |                   |       |                   |       |                     |       |                   |       |
| Sometimes<br>drunk                              |                   |       |                   |       |                   |       |                   |       |                     |       | 1.88 (1.42, 2.49) | <0.01 |
| Often drunk                                     |                   |       |                   |       |                   |       |                   |       |                     |       | 6.55 (4.44, 9.65) | <0.01 |

Note. Estimates in this table are based on binomial mixed-effects models. Any current intimate partner violence (IPV) = emotional, physical and/or sexual IPV. Residence: Reference level (Ref) = Formal; Model 1: unadjusted. Model 2: adjusted for Education attainment (Ref=Higher); Model 3: adjusted for Father beat mother (Ref=No); Model 4: adjusted for Marital status (Ref=Married); Model 5: adjusted for Use of physical violence against spouse/ partner (Ref=No); Model 6: adjusted for Partner's alcohol use (Ref=No alcohol).
