# Supplementary material for: Intra-Urban Variation of Intimate Partner Violence Against Women and Men in Kenya: Evidence from the 2014 Kenya Demographic and Health Survey
Source: PubMed Central journal article supplement (PMC9900693; doi:10.1177/08862605221120893), 2022-09-05
Supplement: sj-pdf-4-jiv-10.1177_08862605221120893.pdf [file sj-pdf-4-jiv-10.1177_08862605221120893.pdf]

**Appendix D.** Estimates from binomial mixed-effects models for any current intimate partner violence against men (age 15-54) in urban areas in Kenya (2014).

| Term                                            | Model 1           |      | Model 2           |      | Model 3           |       | Model 4           |       | Model 5           |       | Model 6           |       |
|-------------------------------------------------|-------------------|------|-------------------|------|-------------------|-------|-------------------|-------|-------------------|-------|-------------------|-------|
|                                                 | OR (95% CI)       | p    | aOR (95%CI)       | p    | aOR (95% CI)      | p     | aOR (95% CI)      | p     | aOR (95% CI)      | p     | aOR (95% CI)      | p     |
| <b>Neighbourhood</b>                            |                   |      |                   |      |                   |       |                   |       |                   |       |                   |       |
| Informal                                        | 1.08 (0.68, 1.73) | 0.73 | 1.19 (0.73, 1.95) | 0.48 | 1.01 (0.63, 1.61) | 0.97  | 1.04 (0.65, 1.67) | 0.87  | 0.87 (0.54, 1.41) | 0.58  | 1.08 (0.68, 1.73) | 0.74  |
| Intermediate                                    | 0.72 (0.47, 1.1)  | 0.13 | 0.75 (0.49, 1.17) | 0.21 | 0.7 (0.46, 1.09)  | 0.11  | 0.71 (0.46, 1.1)  | 0.13  | 0.73 (0.47, 1.13) | 0.16  | 0.74 (0.48, 1.14) | 0.17  |
| <b>Education level</b>                          |                   |      |                   |      |                   |       |                   |       |                   |       |                   |       |
| No/Primary/<br>Secondary                        |                   |      | 0.77 (0.53, 1.13) | 0.18 |                   |       |                   |       |                   |       |                   |       |
| <b>Father beat mother</b>                       |                   |      |                   |      |                   |       |                   |       |                   |       |                   |       |
| Yes                                             |                   |      |                   |      | 1.69 (1.23, 2.32) | <0.01 |                   |       |                   |       |                   |       |
| Don't know                                      |                   |      |                   |      | 1.99 (1.09, 3.66) | 0.03  |                   |       |                   |       |                   |       |
| <b>Marital status</b>                           |                   |      |                   |      |                   |       |                   |       |                   |       |                   |       |
| Cohabiting                                      |                   |      |                   |      |                   |       | 1.35 (0.62, 2.93) | 0.45  |                   |       |                   |       |
| Separated/<br>Divorced/<br>Widowed              |                   |      |                   |      |                   |       | 2.3 (1.38, 3.84)  | <0.01 |                   |       |                   |       |
| <b>Use of physical violence against partner</b> |                   |      |                   |      |                   |       |                   |       |                   |       |                   |       |
| Yes                                             |                   |      |                   |      |                   |       |                   |       | 5.71 (3.92, 8.31) | <0.01 |                   |       |
| <b>Partner's alcohol use</b>                    |                   |      |                   |      |                   |       |                   |       |                   |       |                   |       |
| Yes                                             |                   |      |                   |      |                   |       |                   |       |                   |       | 2.9 (1.6, 5.23)   | <0.01 |

Note. Estimates in this table are based on binomial mixed-effects models. Any current intimate partner violence (IPV) = emotional, physical and/or sexual IPV. Residence: Reference level (Ref) = Formal; Model 1: unadjusted. Model 2: adjusted for Education attainment (Ref=Higher); Model 3: adjusted for Father beat mother (Ref=No); Model 4: adjusted for Marital status (Ref=Married); Model 5: adjusted for Use of physical violence against spouse/ partner (Ref=No); Model 6: adjusted for Partner's alcohol use (Ref=No alcohol).
