# Supplementary material for: Intra-Urban Variation of Intimate Partner Violence Against Women and Men in Kenya: Evidence from the 2014 Kenya Demographic and Health Survey
Source: PubMed Central journal article supplement (PMC9900693; doi:10.1177/08862605221120893), 2022-09-05
Supplement: sj-pdf-5-jiv-10.1177_08862605221120893.pdf [file sj-pdf-5-jiv-10.1177_08862605221120893.pdf]

## Appendix E. Variance of the random effects

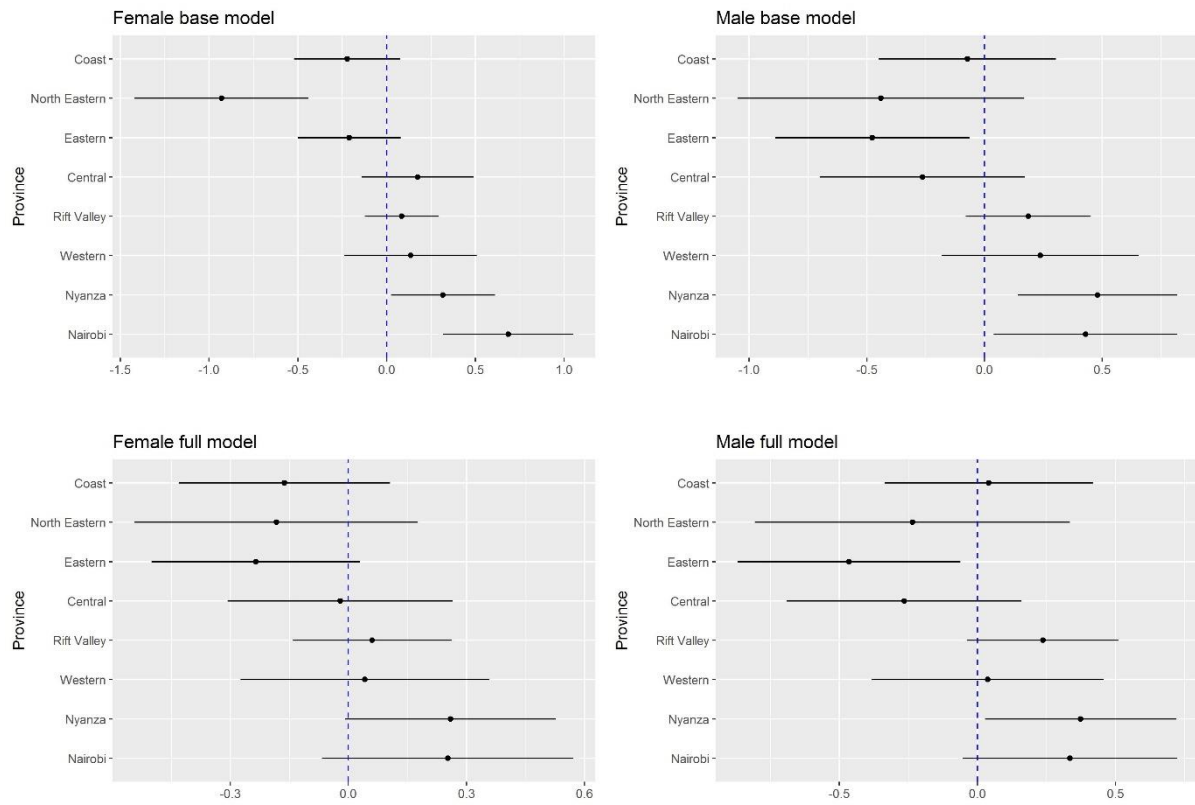

Note. Binomial mixed-effects models for any current intimate partner violence against women (age 15-49) and men (age 15-54) in urban areas in Kenya (2014). Random variable = Province. Any current intimate partner violence (IPV) = emotional, physical and/or sexual IPV.
